# Supplementary material for: Chemical epitaxy of CdS on GaAs
Source: Royal Society of Chemistry journal article supplement (doi:10.1039/c6tc05365c), 2017-01-01
Supplement: c6tc05365c1.pdf [file c6tc05365c1.pdf]

## Electronic Supplementary information

### Chemical Epitaxy of CdS on GaAs

Ofir Friedman, Alexander Upcher, Tzvi Templeman, Vladimir Ezersky and Yuval Golan\*

*Department of Materials Engineering and Ilse Katz Institute for Nanoscale Science and Technology, Ben-Gurion University of the Negev, Be'er-Sheva 8410501, Israel*  
E-mail: ygolan@bgu.ac.il

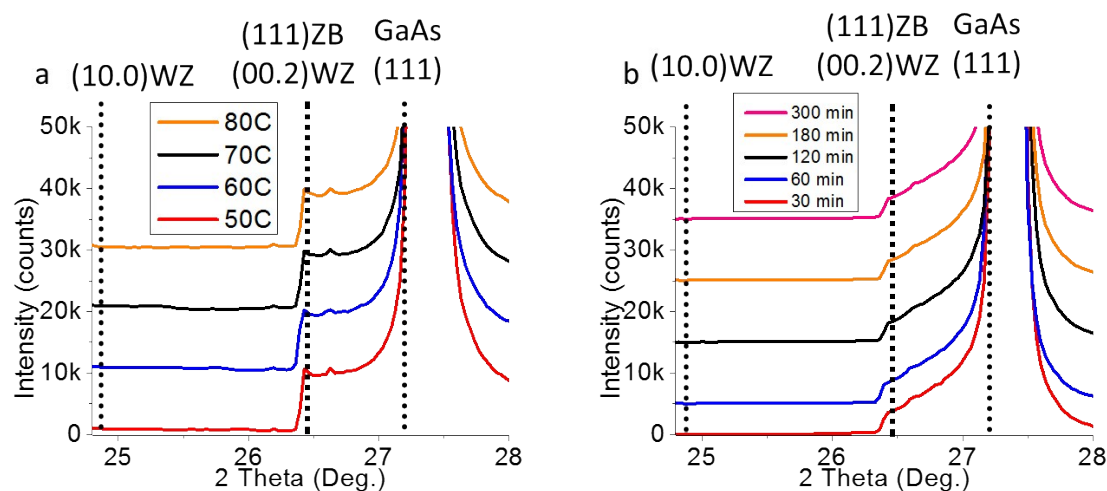

**Fig. S1** XRD pattern of CdS deposited on GaAs(111)A using 7.5 mM CdSO<sub>4</sub>. (a) Effect of temperature for 2 hr of deposition. (b) Effect of deposition duration at a temperature of 60°C.

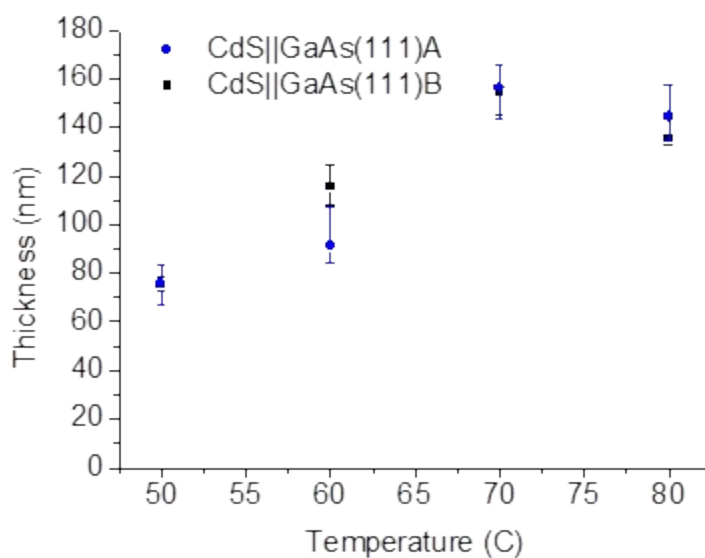

**Fig. S2** Film thickness measurements extracted from cross-section HR-SEM from CdS deposited on GaAs(111)A (blue) and GaAs(111)B (black) using 7.5 mM CdSO<sub>4</sub> for a duration of 2 hr.

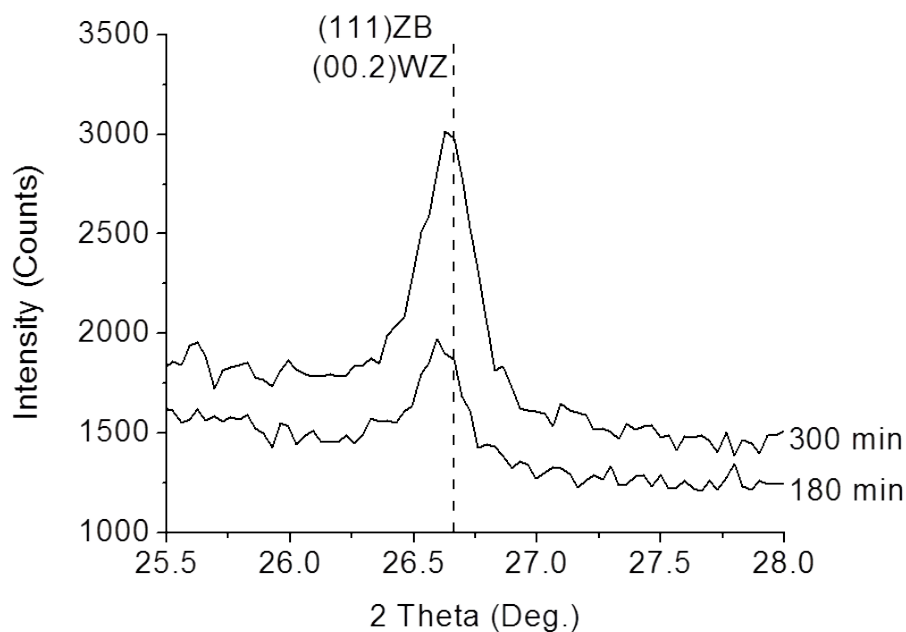

**Fig. S3** XRD pattern of CdS deposited on glass substrates using 5 mM CdSO<sub>4</sub>, deposition temperature of 60°C, and deposition duration of 180 and 300 min.
